# Supplementary material for: Development of a model for shared care between general practice and mental healthcare: a protocol for a co-production study
Source: HighWire-hosted journal article supplement (doi:10.1136/bmjopen-2022-061575), 2022-10-01
Supplement: bmjopen-2022-061575supp001_data_supplement.pdf [file bmjopen-2022-061575supp001_data_supplement.pdf]

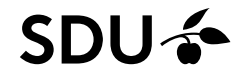

## Consent to processing of personal data

In connection with project Development of a Shared Care Model, SDU wants to collect information about people. SDU is responsible for the protection of personal data collected for the use in research projects. Participation in the project is voluntary. Collection takes place via visits in Psychiatric outpatient clinics in Denmark.

### Purpose of processing information for the project

We want to investigate what people with mental illness and health professionals find important in the treatment process, as well as to elicit their perspectives on shared care, collaboration, and recovery.

### How we use the information

The information is to be processed in accordance with the General Data Protection Regulation (GDPR) art. 6, (1)(a) and art. 9, (2)(a) which are about the rules of consent. SDU will treat the information with confidentiality in accordance with applicable law. We will make sure to keep the data secure so that only relevant researchers at SDU will have access to them. The information will only be used for research purposes.

### Deletion and storage of your data

SDU will delete or anonymise the information when it is no longer relevant to keep. This will most often be when the project is completed, but it may also be later for the sake of possible documentation of the research results. The information will be deleted at the latest five years after the end of the project and will therefore be deleted on December 2028. You may withdraw your consent if you wish to have your data deleted earlier.

Please note

- that you can always withdraw your consent, which means the SDU is obligated to delete the information we have collected about you,
- that you have the right to see the data we have about you,
- that you have the right to request the rectification or deletion of data and
- that you have the right to appeal to the Danish Data Protection Agency about the processing of the information via [www.datatilsynet.dk](http://www.datatilsynet.dk).

You always have the option of withdrawing your consent by writing to [mhmarcussen@health.sdu.dk](mailto:mhmarcussen@health.sdu.dk).

### Publication

There will be no publication of data within which you can be identified. Your personal data is anonymised before being included in the publication of the results of the research. This means that it is not possible to retrieve your information within any publications.

### More information

If you have any questions about the research, you can contact Michael Marcussen at any time. +45 26369503 or [mhmarcussen@health.sdu.dk](mailto:mhmarcussen@health.sdu.dk).

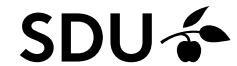

If you have any questions regarding data protection or your rights, you can contact our Data Protection Officer, Simon Kamber, by calling +45 65 50 39 06 or sending an email to [dpo@sdu.dk](mailto:dpo@sdu.dk).

If you wish to file a complaint about the processing of personal data, you can contact the Danish Data Protection Agency via [www.datatilsynet.dk](http://www.datatilsynet.dk).

## Declaration of consent

- I understand that participation in the project is voluntary.
- I understand that information about me will only be used for research.

---

| Date | Name | Signature |
|------|------|-----------|
|------|------|-----------|
